# Supplementary material
Source: HighWire-hosted journal article supplement (https://bmjopen.bmj.com/content/15/5/e093558)
Supplement: inline-supplementary-material-1 [file inline-supplementary-material-1.pdf]

| Referral note for Palliative care consultation                                                                           |                                                                                                                                                                                                                                                                                                                                                                                                                                                                                                                                                                                                                                                                                                                                                |                                                                                                                                                                   |
|--------------------------------------------------------------------------------------------------------------------------|------------------------------------------------------------------------------------------------------------------------------------------------------------------------------------------------------------------------------------------------------------------------------------------------------------------------------------------------------------------------------------------------------------------------------------------------------------------------------------------------------------------------------------------------------------------------------------------------------------------------------------------------------------------------------------------------------------------------------------------------|-------------------------------------------------------------------------------------------------------------------------------------------------------------------|
| Date of referral                                                                                                         | YYYY-MM-DD                                                                                                                                                                                                                                                                                                                                                                                                                                                                                                                                                                                                                                                                                                                                     |                                                                                                                                                                   |
| Purpose of consultation (multiple choices allowed)                                                                       | <div><input type="checkbox"/> management of patient’s pain, physical, and psychological symptoms</div> <div><input type="checkbox"/> enhancement of understanding about the disease and mediation decisional conflict</div> <div><input type="checkbox"/> psychosocial and emotional support for patients and families</div> <div><input type="checkbox"/> supporting setting care goals related to patient values and preferences</div> <div><input type="checkbox"/> providing information on available resources</div> <div><input type="checkbox"/> bereavement support</div> <div><input type="checkbox"/> consultation for medical assessment (etc. terminal and end-of-life phases)</div> <div><input type="checkbox"/> etc(    )</div> |                                                                                                                                                                   |
|                                                                                                                          | Primary reason for consultation                                                                                                                                                                                                                                                                                                                                                                                                                                                                                                                                                                                                                                                                                                                |                                                                                                                                                                   |
| Preference for the specialized services of the Center for Palliative Care and Clinical Ethics (multiple choices allowed) | <div><input type="checkbox"/> Registration for SNUH Consultative Hospice (※Eligibility and conditions can be confirmed by the center)</div> <div><input type="checkbox"/> Provision of hospice information (including guidance on facilities)</div> <div><input type="checkbox"/> Use of end-of-life care rooms</div> <div><input type="checkbox"/> clinical ethics consultation (including consideration by ethics committee)</div> <div><input type="checkbox"/> None of the above</div>                                                                                                                                                                                                                                                     |                                                                                                                                                                   |
| Patient’s medical issues/ concerns                                                                                       |                                                                                                                                                                                                                                                                                                                                                                                                                                                                                                                                                                                                                                                                                                                                                |                                                                                                                                                                   |
| Patient’s medical condition                                                                                              | <div><input type="radio"/> Terminal stage: No possibility of fundamental recovery despite active treatment, with progressively worsening symptoms</div> <div><input type="radio"/> End-of-life stage: No possibility of recovery, with rapidly worsening symptoms despite treatment, and death is imminent</div> <div><input type="radio"/> Neither in the terminal nor end-of-life stage, but requires palliative care</div>                                                                                                                                                                                                                                                                                                                  |                                                                                                                                                                   |
| Expected prognosis                                                                                                       | <div><input type="radio"/> A few days <input type="checkbox"/> a few weeks <input type="checkbox"/> a few months <input type="checkbox"/> a few years <input type="checkbox"/> uncertain</div>                                                                                                                                                                                                                                                                                                                                                                                                                                                                                                                                                 |                                                                                                                                                                   |
| Potential for functional recovery                                                                                        | Recovery to normal life (ADL, social engagement, etc)                                                                                                                                                                                                                                                                                                                                                                                                                                                                                                                                                                                                                                                                                          | <div><input type="radio"/> High likelihood <input type="checkbox"/> low likelihood <input type="checkbox"/> nolikelihood <input type="checkbox"/> uncertain</div> |
|                                                                                                                          | Recovery to pre-ICU admission status                                                                                                                                                                                                                                                                                                                                                                                                                                                                                                                                                                                                                                                                                                           | <div><input type="radio"/> High likelihood <input type="checkbox"/> low likelihood <input type="checkbox"/> nolikelihood <input type="checkbox"/> uncertain</div> |
|                                                                                                                          | Significant consciousness recovery                                                                                                                                                                                                                                                                                                                                                                                                                                                                                                                                                                                                                                                                                                             | <div><input type="radio"/> High likelihood <input type="checkbox"/> low likelihood <input type="checkbox"/> nolikelihood <input type="checkbox"/> uncertain</div> |

|                                     |                                                                                               |                                                                                                                                                                                   |
|-------------------------------------|-----------------------------------------------------------------------------------------------|-----------------------------------------------------------------------------------------------------------------------------------------------------------------------------------|
| Treatment plan                      | The best treatment plan as determined by the attending physician                              |                                                                                                                                                                                   |
|                                     | Consistency of medical team opinions on treatment plan                                        | <input type="checkbox"/> consensus <input type="checkbox"/> disagreement within the department <input type="checkbox"/> disagreement within other departments                     |
| Decisional issues                   | Issues to be addressed in decision-making based on the anticipated progression of the disease |                                                                                                                                                                                   |
| Physician-family discussion process | Briefly describe the progress of discussions with family members                              |                                                                                                                                                                                   |
| Family evaluation                   | Level of caregiving burden                                                                    | <input type="checkbox"/> none <input type="checkbox"/> slight <input type="checkbox"/> moderate to significant <input type="checkbox"/> severe <input type="checkbox"/> uncertain |
|                                     | Level of psychological stress                                                                 | <input type="checkbox"/> none <input type="checkbox"/> slight <input type="checkbox"/> moderate to significant <input type="checkbox"/> severe <input type="checkbox"/> uncertain |
